# Supplementary material for: Carbon Catabolite Repression in Yeast is Not Limited to Glucose
Source: PubMed Central journal article supplement (PMC6482301; doi:10.1038/s41598-019-43032-w), 2019-04-24

Supplementary Material for:

## **Carbon Catabolite Repression in Yeast is Not Limited to Glucose**

Kobi Simpson-Lavy and Martin Kupiec<sup>1</sup>

School of Molecular Cell Biology & Biotechnology, Tel Aviv University, Ramat Aviv 69978, Israel.

<sup>1</sup>. Corresponding author: [martin@post.tau.ac.il](mailto:martin@post.tau.ac.il)

**Table S1. Yeast Strains used in this study.**

All yeast strains are derived from BY4741 *MATa his3Δ1, leu2Δ0, ura3Δ0, met15Δ0*.

| Number | Genotype                                              | Source              |
|--------|-------------------------------------------------------|---------------------|
| 1      | WT                                                    | Lab collection      |
| 2      | <i>haa1::KAN</i>                                      | Deletion collection |
| 3      | <i>hrr25::KAN</i>                                     | Liu Z (1)           |
| 4      | <i>hrr25Δ::kanMX4</i> [pRS415-HRR25(E52D)]            | Liu Z (1)           |
| 5      | <i>hrr25Δ::kanMX4 haa1::HIS3</i> [pRS415-HRR25(E52D)] | Liu Z (1)           |
| 6      | <i>msn5::NAT</i>                                      | This study          |
| 7      | <i>haa1::KAN msn5::NAT</i>                            | This study          |
| 8      | <i>adr1::KAN</i>                                      | Deletion collection |
| 9      | <i>adr1::KAN haa1::HygB</i>                           | This study          |
| 10     | <i>ady2::KAN</i>                                      | Deletion collection |
| 11     | <i>fps1::KAN</i>                                      | Deletion collection |
| 12     | <i>fps1::KAN ady2::HygB</i>                           | This study          |
| 13     | <i>fps1::KAN jen1::NAT</i>                            | This study          |
| 14     | <i>jen1::NAT</i>                                      | This study          |
| 15     | <i>ady2::KAN jen1::NAT</i>                            | This study          |
| 16     | <i>fps1::KAN jen1::NAT ady2::HygB</i>                 | This study          |
| 17     | <i>acs1::KAN</i>                                      | Deletion collection |
| 18     | <i>fps1::KAN jen1::NAT ady2::HygB acs1::HIS3</i>      | This study          |
| 19     | <i>ald4::KAN</i>                                      | Deletion collection |
| 20     | <i>ald5::KAN</i>                                      | Deletion collection |
| 21     | <i>ald6::KAN</i>                                      | Deletion collection |
| 22     | <i>ald4::KAN ald5::NAT</i>                            | This study          |
| 23     | <i>ald4::KAN ald6::NAT</i>                            | This study          |
| 24     | <i>ald6::KAN ald5::NAT</i>                            | This study          |
| 25     | <i>ald4::KAN ald5::HygB ald6::NAT</i>                 | This study          |
| 26     | <i>ald4::KAN ald6::NAT acs1::HIS3</i>                 | This study          |
| 27     | <i>adh2::KAN</i>                                      | Deletion collection |

**Table S2. Plasmids Used in this study**

| Name                  | Genotype                            | Vector/Markers                      | Source          |
|-----------------------|-------------------------------------|-------------------------------------|-----------------|
| prs315                |                                     | LEU2                                | Lab collection  |
| pBGM18                | <i>prADH2::LacZ</i>                 | pRS316, 313 (changed by gap repair) | Elton Young (2) |
| YRO2-LacZ             | <i>1929bp prYRO2::LacZ</i>          | pRS416 URA3                         | Z. Liu (1)      |
| Haa1-GFP              | <i>prHAA1::HAA1-GFP</i>             | pRS416 URA3                         | Z. Liu (1)      |
| Adr1 <sup>S230A</sup> | <i>prADH1::ADR1<sup>S230A</sup></i> | CEN KAN LEU2 (changed from TRP1)    | Elton Young (3) |

|           |                     |                     |                  |
|-----------|---------------------|---------------------|------------------|
| ALD6-OE   | prADH1::ALD6-GFP    | pRS415 LEU2         | This study       |
| ALD4-LacZ | prALD4::LacZ        | yep357 2 $\mu$ URA3 | J. Ariño (4)     |
| ALD5-LacZ | prALD5::LacZ        | yep357 2 $\mu$ URA3 | J. Ariño (4)     |
| ALD6-LacZ | prALD6::LacZ        | yep357 2 $\mu$ URA3 | J. Ariño (4)     |
| ACS1-LacZ | prACS1::LacZ        | yep357 2 $\mu$ URA3 | H. Schueller (5) |
| ACS2-LacZ | 1000bp prACS2::LacZ | Ycp50 CEN URA3      | This study       |

1. Collins ME, Black JJ, & Liu Z (2017) Casein Kinase I Isoform Hrr25 Is a Negative Regulator of Haa1 in the Weak Acid Stress Response Pathway in *Saccharomyces cerevisiae*. *Appl Environ Microbiol* 83(13).
2. Dombek KM, Voronkova V, Raney A, & Young ET (1999) Functional analysis of the yeast Glc7-binding protein Reg1 identifies a protein phosphatase type 1-binding motif as essential for repression of ADH2 expression. (Translated from eng) *Mol Cell Biol* 19(9):6029-6040 (in eng).
3. Ratnakumar S, Kacherovsky N, Arms E, & Young ET (2009) Snf1 controls the activity of adr1 through dephosphorylation of Ser230. (Translated from eng) *Genetics* 182(3):735-745 (in eng).
4. Ruiz A, Serrano R, & Arino J (2008) Direct regulation of genes involved in glucose utilization by the calcium/calcineurin pathway. *J Biol Chem* 283(20):13923-13933.
5. Kratzer S & Schuller HJ (1995) Carbon source-dependent regulation of the acetyl-coenzyme A synthetase-encoding gene ACS1 from *Saccharomyces cerevisiae*. *Gene* 161(1):75-79.

Suppl. Figure legends

**Figure S1:** Simplified diagram illustrating the metabolic pathways leading to cytoplasmic acetyl-coA, together with the carbon sources used for this work. Resp. = respiration conditions. Cyto. = cytoplasm Mito. = mitochondrial.

**Figure S2 a, b, c, d, e.** Cells were grown for 24 hours in 5ml of the indicated media (without dilution) and indicated gene expression measured. Expression is normalized against WT in ethanol medium. N=3. Error bars are one standard deviation .

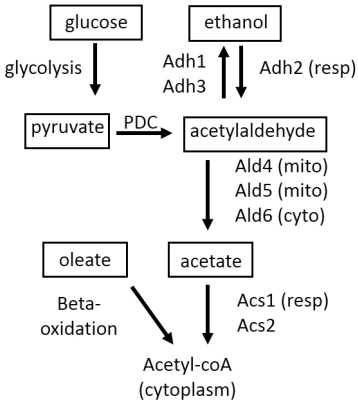

a

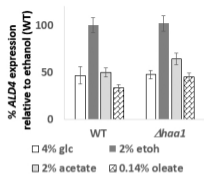

b

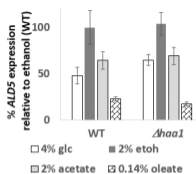

c

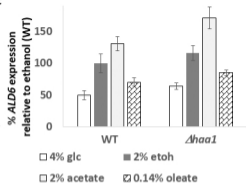

d

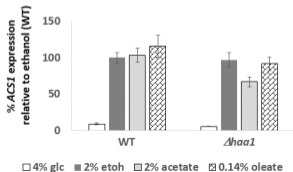

e

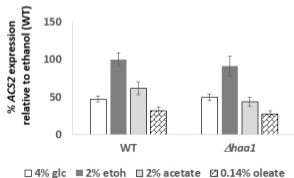

Supplement: 41598_2019_43032_MOESM1_ESM.pdf [file 41598_2019_43032_MOESM1_ESM.pdf]
